# Supplementary material for: Genomic and Transcriptomic Characterization of Canine Osteosarcoma Cell Lines: A Valuable Resource in Translational Medicine
Source: Front Vet Sci. 2021 May 17;8:666838. doi: 10.3389/fvets.2021.666838 (PMC8165228; doi:10.3389/fvets.2021.666838)
Supplement: Supplementary Data 3 — List of known osteosarcoma-associated gene in dogs and humans. [file Data_Sheet_3.XLSX]

## Sheet: List genes
TP53
RB1
PTEN
RHOC
RUNX2
TUSC3
EGFR
NOTCH1
MET
IGF1
HER2
MTOR
NTRK1
EZR
CXCR4
MMP2
MMP9
RANKL
CTNNB1
PD-L1
COX2
PDGFRB
MYC
CDKN2A
CDKN2B
TGFB1
CXCL8
TP63
BRCA1
BRCA2
PIK3CA
FAS
FASLG
DLG2
CDK4
CDK6
MDM2
CARD11
CCNE1
COPS3
AKT1
E1F
SMAD4
ATM
ATRX
FANCA
RECQL4
NF1
TSC2
MLLT2
MLLT3
DMD
APC
PMS2
RUNX1
KRAS
NF2
RET
VHL
ALK
CDH1
MSH2
MSH6
NRAS
PALB2
PTCH1
SDHA
SDHB
GRM4
NFIB
BLM
WRN
SETD2
